## RETRACTION

# Retraction: Eya1 controls cell polarity, spindle orientation, cell fate and Notch signaling in distal embryonic lung epithelium.

Development doi: 10.1242/dev.058479

**Ahmed HK El-Hashash, Gianluca Turcatel, Denise Al Alam, Sue Buckley, Hiroshi Tokumitsu, Saverio Bellusci and David Warburton**

The journal is retracting ‘Eya1 controls cell polarity, spindle orientation, cell fate and Notch signalling in distal embryonic lung epithelium’ by Ahmed HK El-Hashash, Gianluca Turcatel, Denise Al Alam, Sue Buckley, Hiroshi Tokumitsu, Saverio Bellusci and David Warburton (2011). *Development* **138**, 1395-1407 (doi: 10.1242/dev.058479).

This Retraction updates and replaces the Publisher’s Note (doi: 10.1242/dev.148718) relating to the above-referenced article. Development is retracting this article at the request of the institution. The authors have been notified of this request.

Unfortunately, the journal has no further information on the reasons behind this retraction.
